# Supplementary material
Source: PubMed Central journal article supplement (PMC3440233)
Supplement: supp_pp.111.188409_188409Sup.pdf [file supp_pp.111.188409_188409Sup.pdf]

Table S1. List of primers used in this study for genotyping of mutant and transgenic lines.

| Primer name   | Sequence (5' to 3')            | References                                                  |
|---------------|--------------------------------|-------------------------------------------------------------|
| T6G15 9538F   | AATGTTGGCTTGTTCCCTTG           |                                                             |
| T6G15 53634R  | TGGTGGTACAATGGTCAACG           |                                                             |
| T6G15 24488F  | TCAAACAAGGTGGAGACAGAGA         |                                                             |
| AT4G13490F2   | TGGCTAATGATGCTGACGAA           |                                                             |
| K5K13 F38890  | GATCACATTCCAACAACAGA           |                                                             |
| K5K13 R39225  | CGAGCTTCGATCTGAAAAGC           |                                                             |
| LB1           | CAAACCAGCGTGGACCGCTTGCTGCAACTC | <a href="http://signal.salk.edu">http://signal.salk.edu</a> |
| TIR1gF547     | ATTGAGGCCATGTCTTCGTC           |                                                             |
| TIR1gR913     | GAACAACGCAGCAAAACCTA           |                                                             |
| AXR1-12F      | TTCGGAGCATTATCAGAAACA          |                                                             |
| AXR1-12R      | GGGAAAATTCGCACCTGTAA           |                                                             |
| CSN5A-1F      | CATTAGTCCCCAAATCCATA           |                                                             |
| CSN5A-1R2     | CCAGCTTGCTGGTCTGAGAG           |                                                             |
| LBb1          | CAGCGTGGACCGCTTGCTGCAACTCTCTCA | Dohmann et al., 2008                                        |
| 13520ATG-topo | CACCATGAGGCCGATGCAGCTGG        |                                                             |
| 13520R-TAA    | GTTGATATCGGTGTCATCGAA          |                                                             |
| 13520R+TAA    | TTAGTTGATATCGGTGTCATC          |                                                             |

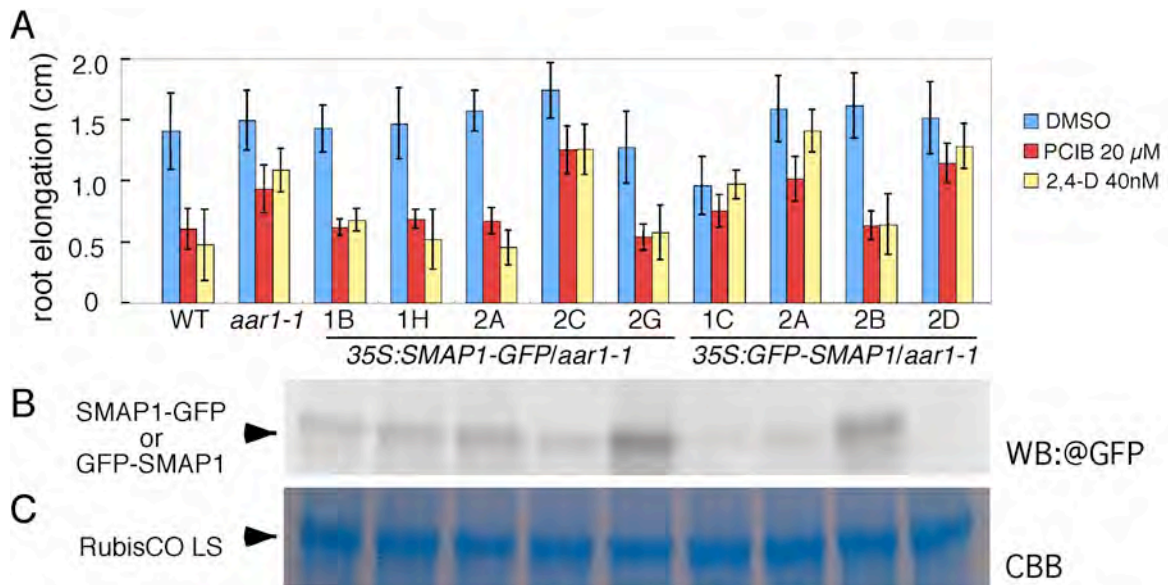

**Figure S1. Complementation of the *aar1-1* phenotype with SMAP1 and GFP fusion protein expressed under control of the 35S promoter.**

Five independent transgenic lines for *35S:SMAP-GFP* (line 1B, 1H, 2A, 2C, 2G) and four lines for *35S:GFP-SMAP1* (line 1C, 2A, 2B, 2D) were generated by transforming *aar1-1* mutants.

(A) Seeds were sown on germination medium (GM) containing indicated chemicals and grown vertically. Root elongation from day 4 to 7 was determined.

(B and C) Total proteins were separated by SDS-PAGE, followed by western blotting with immunodetection using anti-GFP antibody (B) or Coomassie blue (CBB) staining (C). Restoring sensitivity to PCIB and 2,4-D in the *aar1-1* background was correlated with expression level of SMAP1-GFP or GFP-SMAP1 fusion protein.

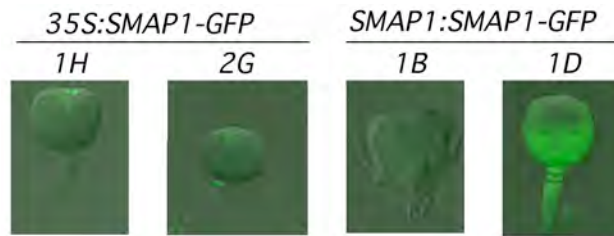

**Figure S2. Expression of SMAP1-GFP at early embryonic stage.**

Embryos from independent transgenic lines of *35S:SMAP1-GFP/aar1-1* (lines 1H and 2G) and *SMAP1:SMAP1-GFP/aar1-1* (lines 1B and 1D) were observed under a confocal microscope ( $n > 6$ ). *SMAP1:SMAP1-GFP/aar1-1* 1D showed strong GFP fluorescence and complemented the abnormal phenotype of the *axr1-12 aar1-1* double mutant when crossed with *axr1-12* (Figure 2X). The remaining three lines showed only weak GFP fluorescence and did not effectively complement the double mutant (Figure 2O–W, and Y).

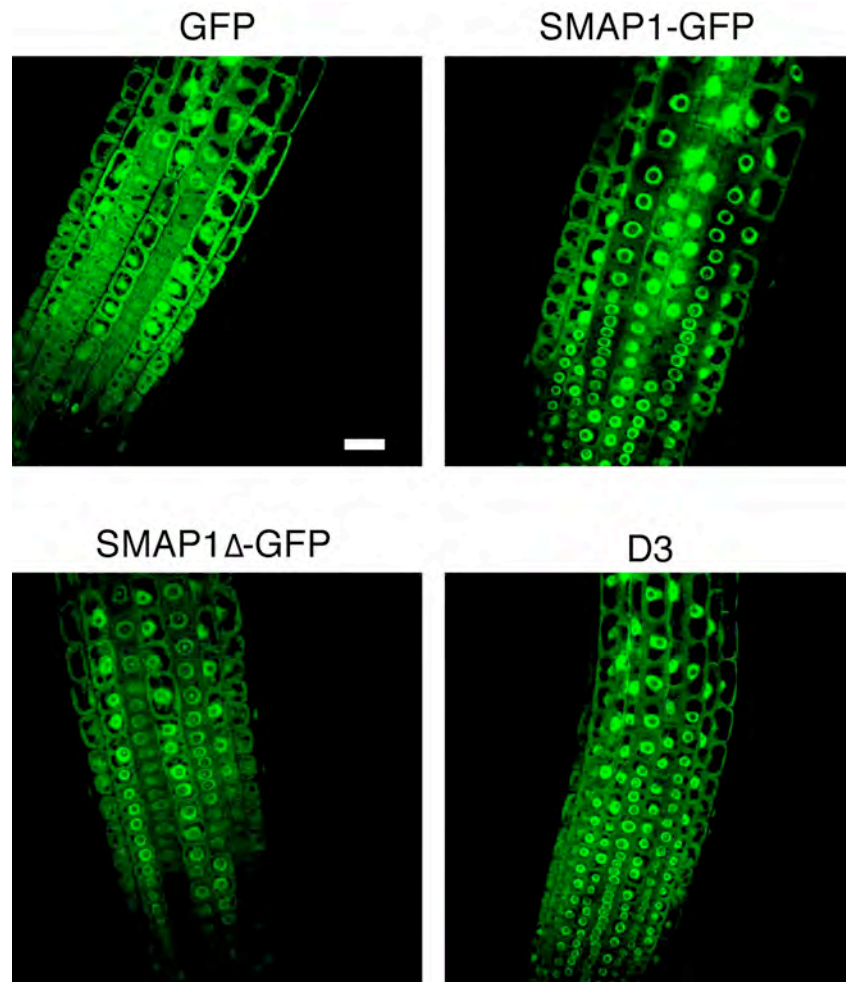

**Figure S3 Cellular localization of GFP fluorescence in root tip epidermal cells of 7-d-old plants. Bar = 20  $\mu$ m.**

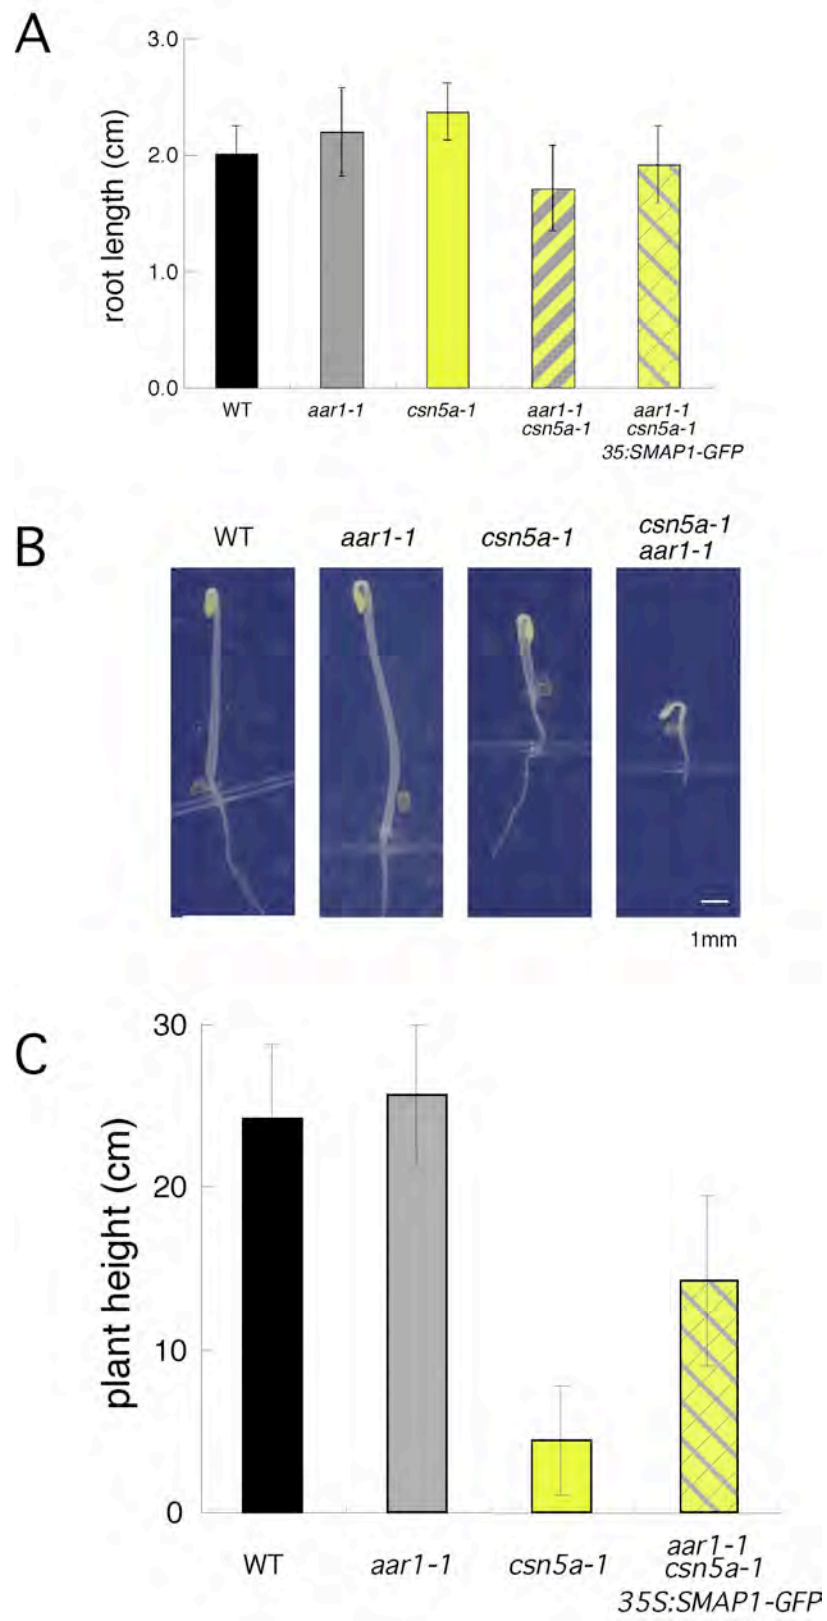

**Figure S4. Additional data for genetic interaction between *CSN5A* and *SMAP1*.**

**(A)** Root length of 7-d-old light-grown seedlings grown on GM without growth regulators. Data are mean  $\pm$  SD ( $n$  = at least 13 seedlings).

**(B)** Photographs of 3-d-old dark-grown seedlings grown on GM without growth regulators. Bar = 1 mm.

**(C)** Height of adult plants shown in Figure 7E. Data are mean  $\pm$  SD ( $n$  = > 9 plants).
